# Supplementary material for: Chemical profiling and total quality assessment of Isodon japonica using data-independent acquisition mode combined with superimposed multiple product ion UHPLC-Q-TOF-MS and chemometric analysis
Source: Royal Society of Chemistry journal article supplement (doi:10.1039/c8ra08732f), 2019-01-01
Supplement: c8ra08732f1.pdf [file c8ra08732f1.pdf]

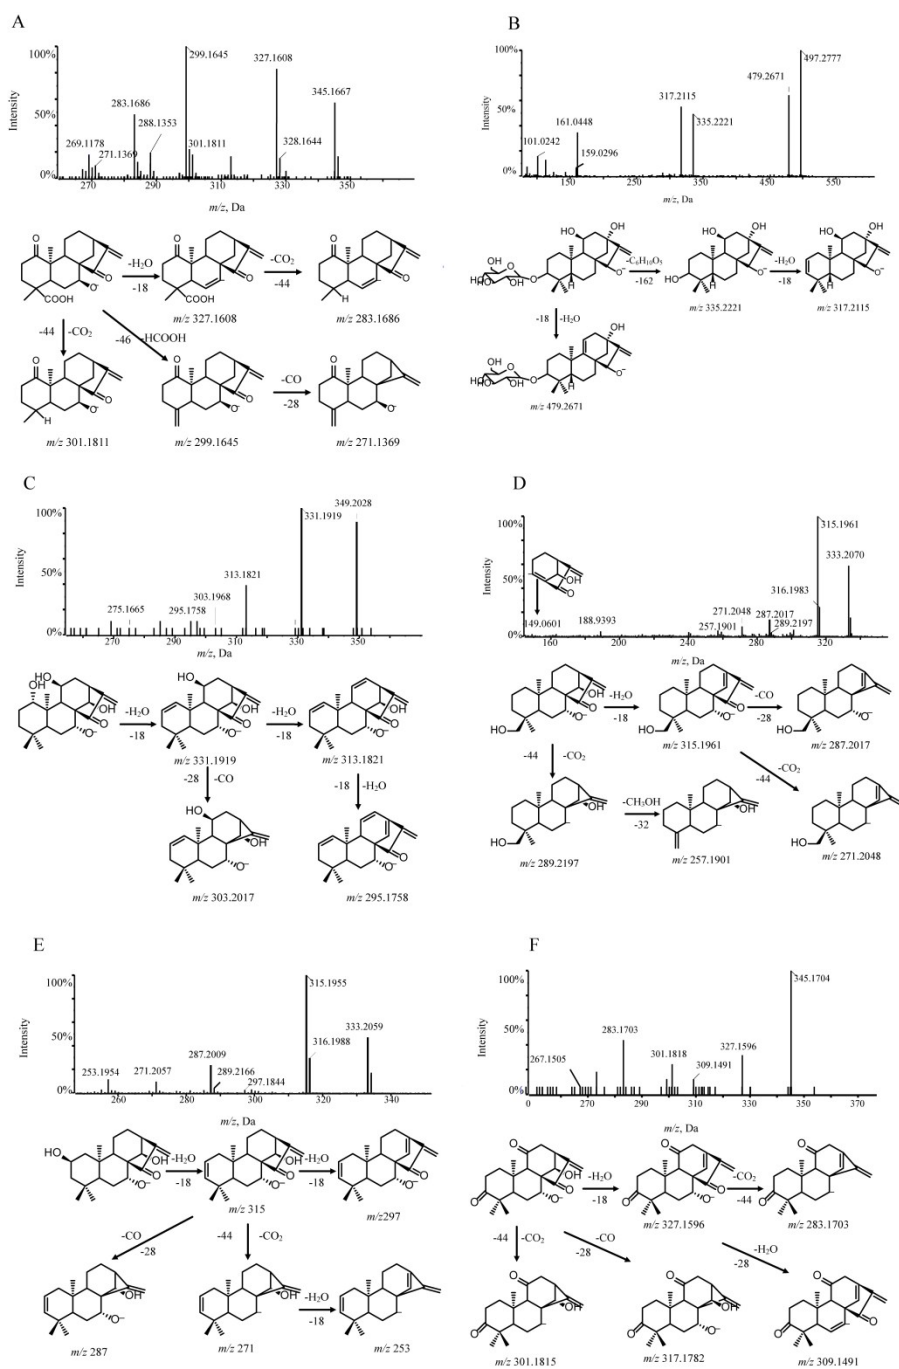

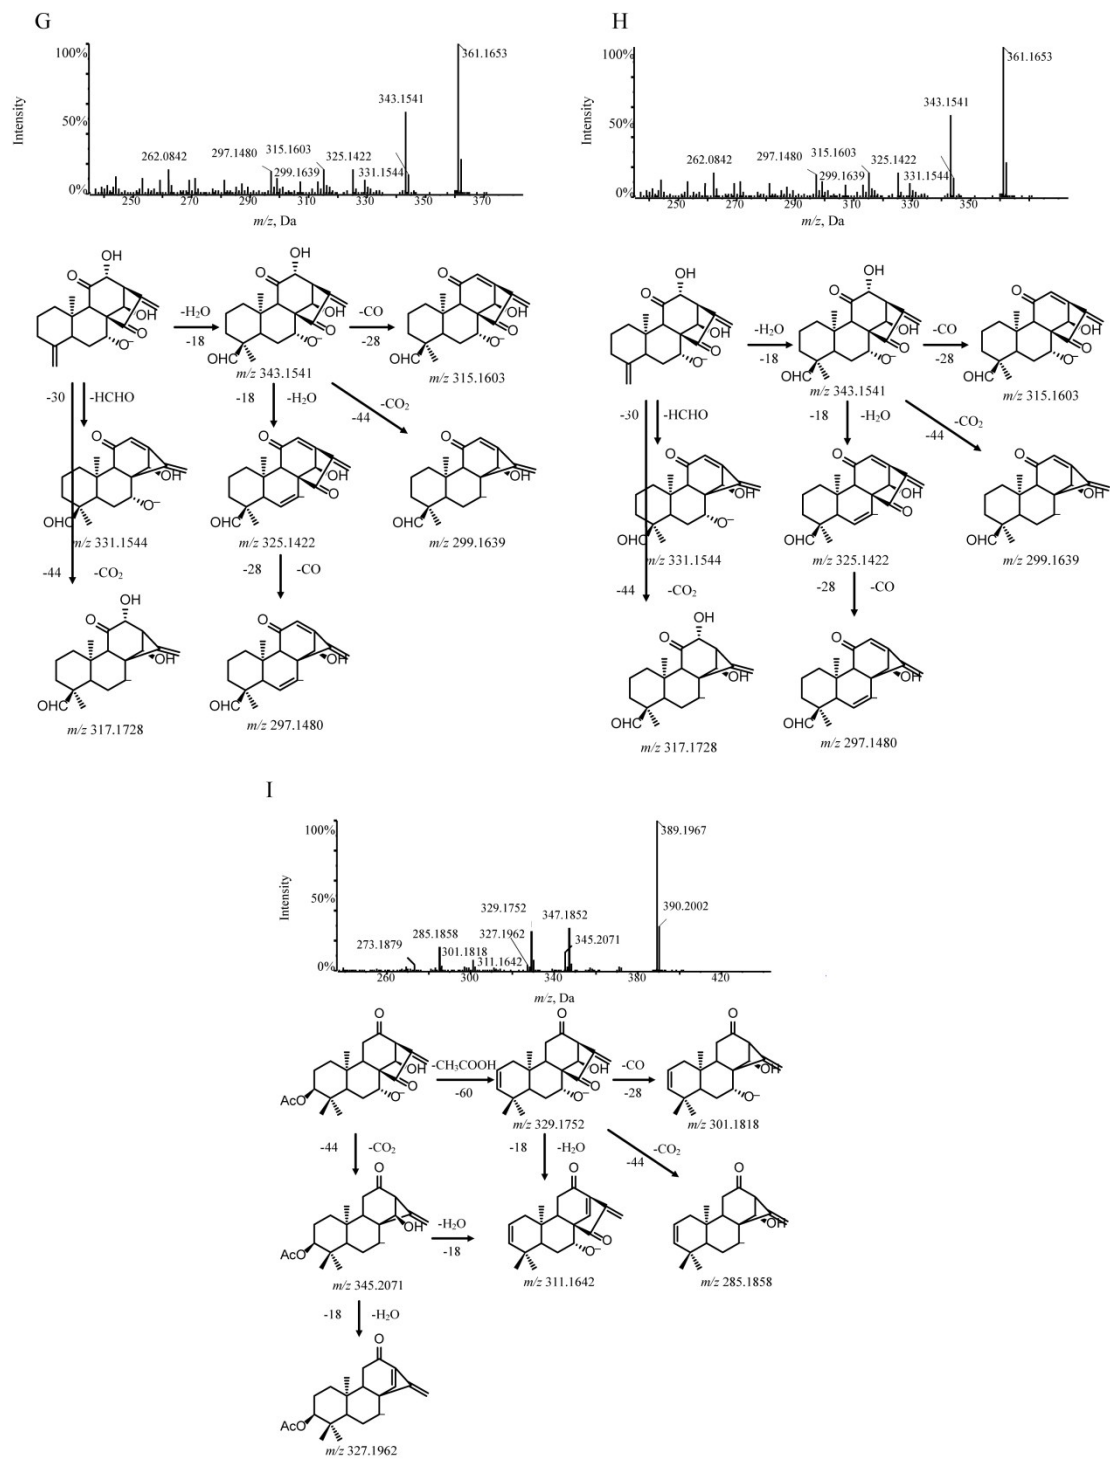

**Fig. S1.** MS/MS spectra and cleavage pathways of compounds 2 (A), 5 (B), 9 (C), 10, 17 (D), 22, 23 (E), 11 (F), 18 (G), 19 (H), and 21 (I).

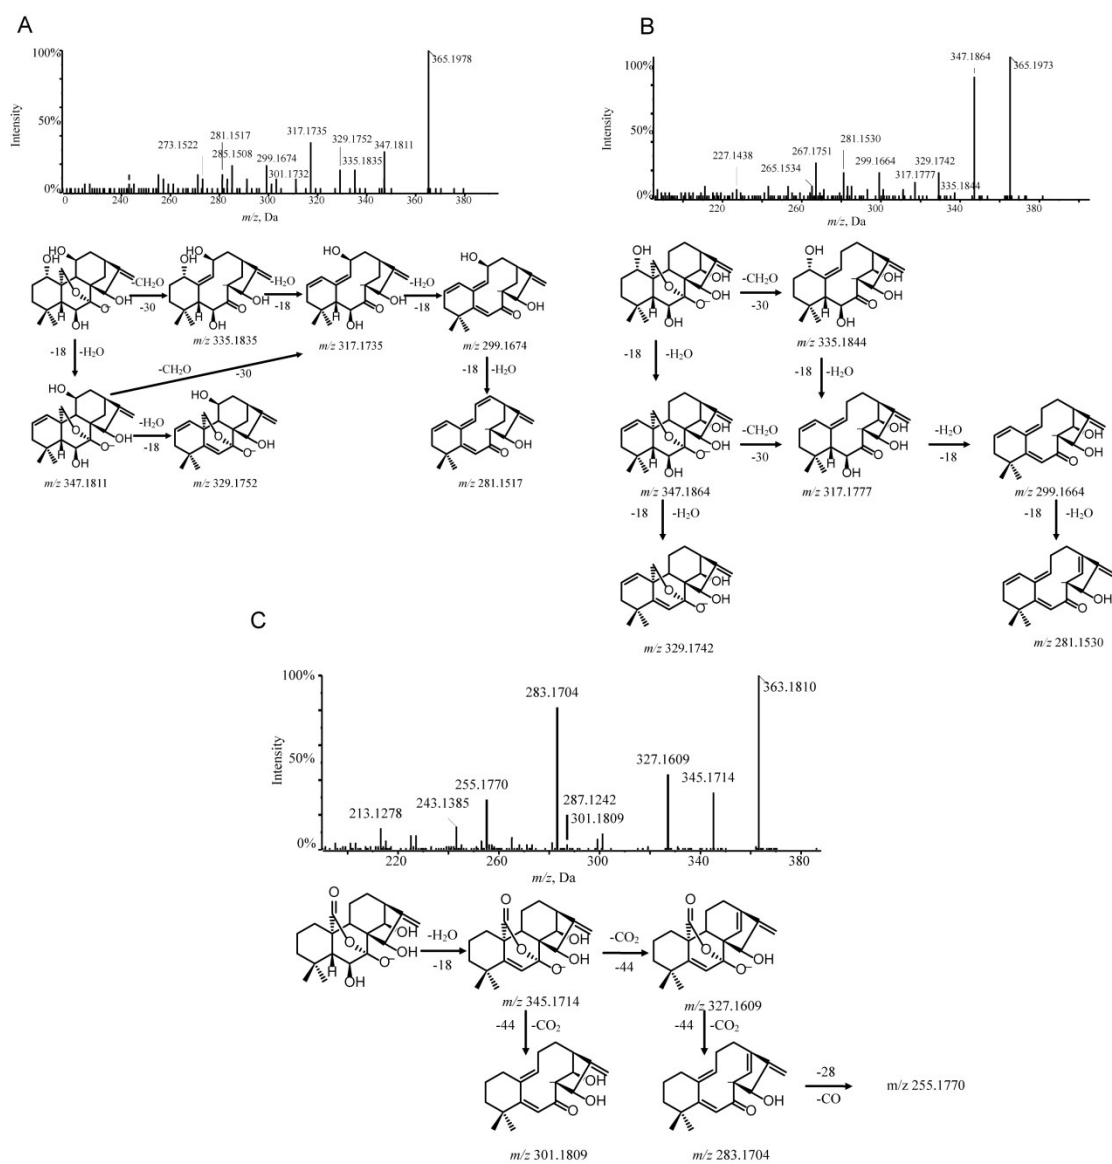

**Fig. S2.** MS/MS spectra and cleavage pathways of compounds hebeirubescensin K (A), enmenol (B) and rabdotermin A (C).

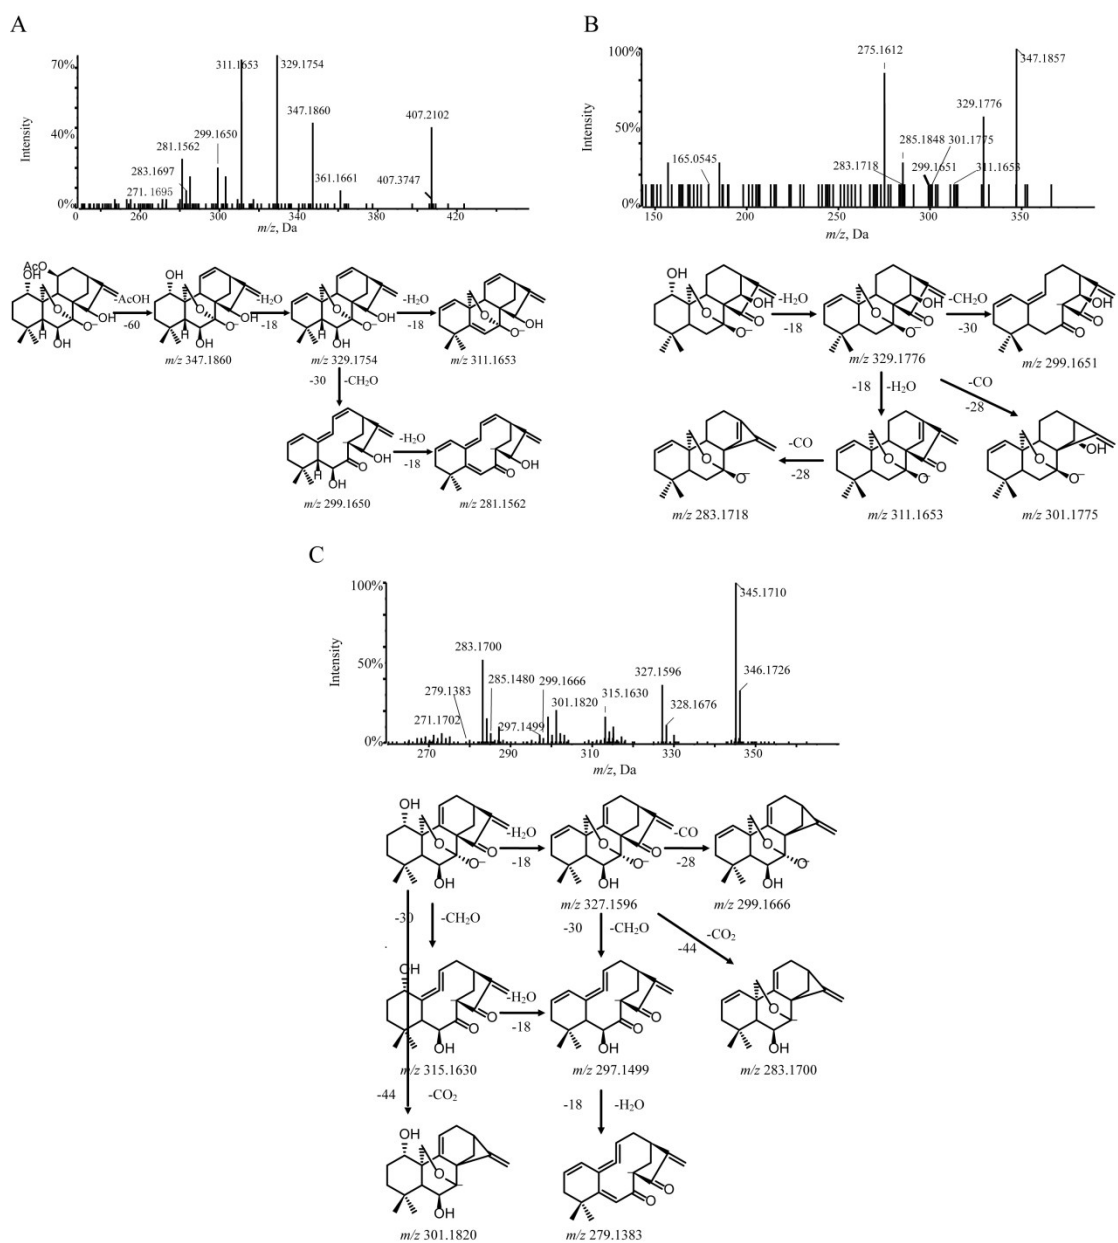

**Fig. S3.** MS/MS spectra and cleavage pathways of compounds 7 (A), 15 (B) and 20 (C).

**Table S1**

The component matrix of the 8 detected compounds of *Isodon japonica*.

|                    | PC1    | PC2    |
|--------------------|--------|--------|
| Hebeirubescensin K | 0.805  | 0.486  |
| Enmenol            | 0.821  | 0.417  |
| Henryin            | -0.028 | 0.938  |
| Lasiodonin         | -0.513 | -0.002 |
| Oridonin           | 0.931  | -0.304 |
| Glaucocalyxin A    | 0.841  | 0.111  |
| Ponicidin          | 0.961  | -0.221 |
| Rabdoternin A      | 0.908  | -0.336 |
